# Supplementary material for: Chronic kidney diseases and inflammation research: a bibliometric analysis
Source: Frontiers journal article supplement (doi:10.3389/fmed.2024.1388665), 2024-09-20
Supplement: Image_1.pdf [file Image_1.pdf]

**PRISMA 2020 flow diagram for new systematic reviews which included searches of databases and registers only**

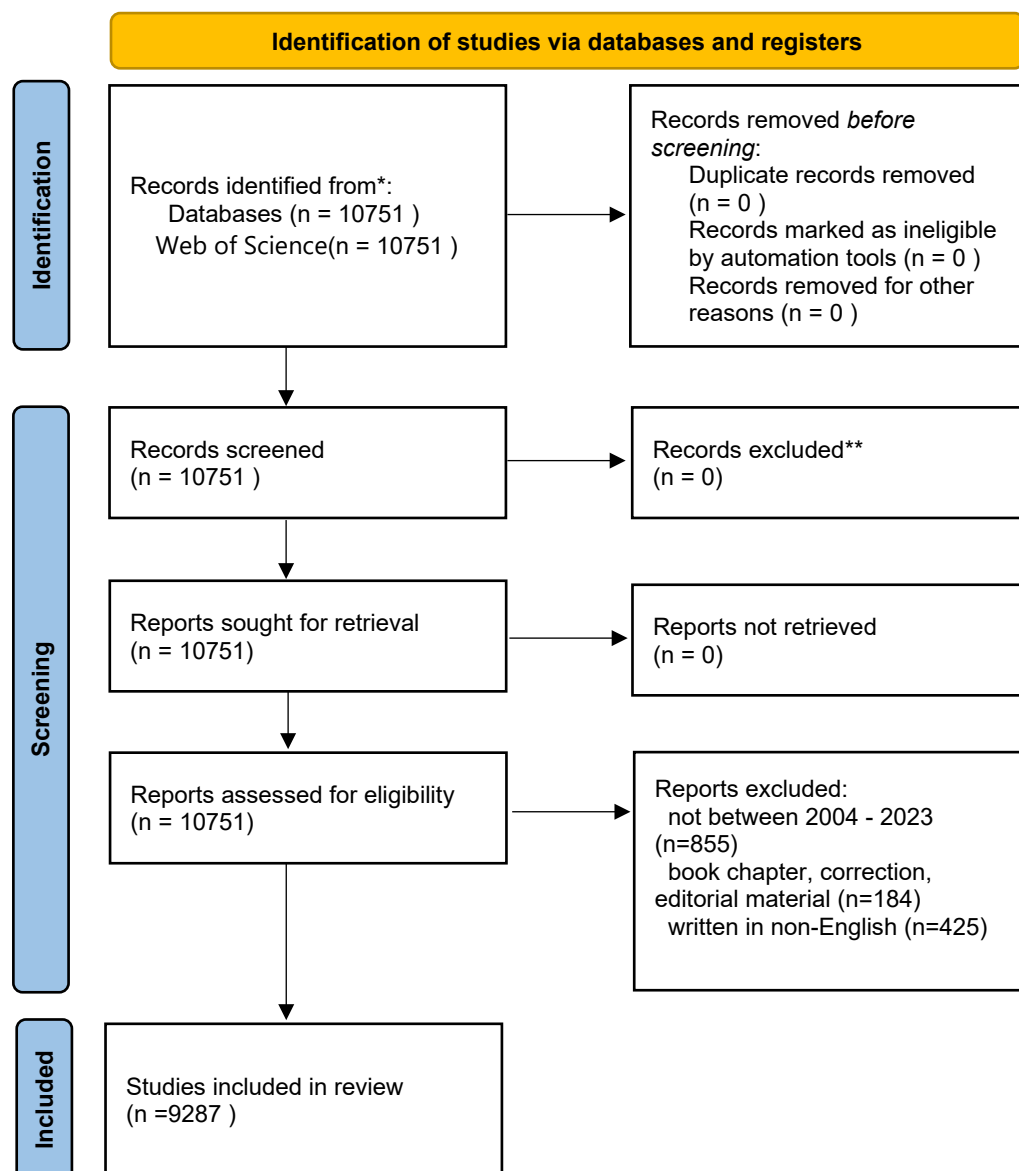

\*Consider, if feasible to do so, reporting the number of records identified from each database or register searched (rather than the total number across all databases/register).

\*\*If automation tools were used, indicate how many records were excluded by a human and how many were excluded by automation tools.
